# Supplementary material for: Polycation‐Capped CdS Quantum Dots Synthesized in Reverse Microemulsions
Source: Hindawi journal article supplement (doi:10.1155/2012/478153), 2012-01-01
Supplement: f1 [file 478153.f1.docx]

Supplementary data


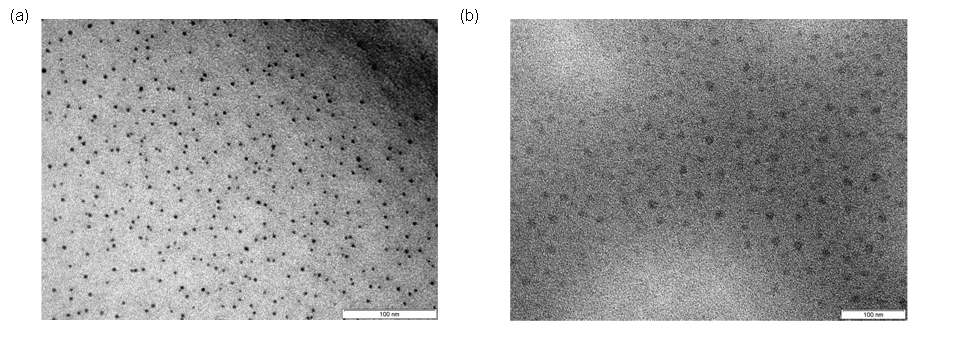


1. Fig. 7. TEM micrographs of individual CdS nanoparticles (a) and particle aggregates (b) synthesized in aqueous PEI-solution


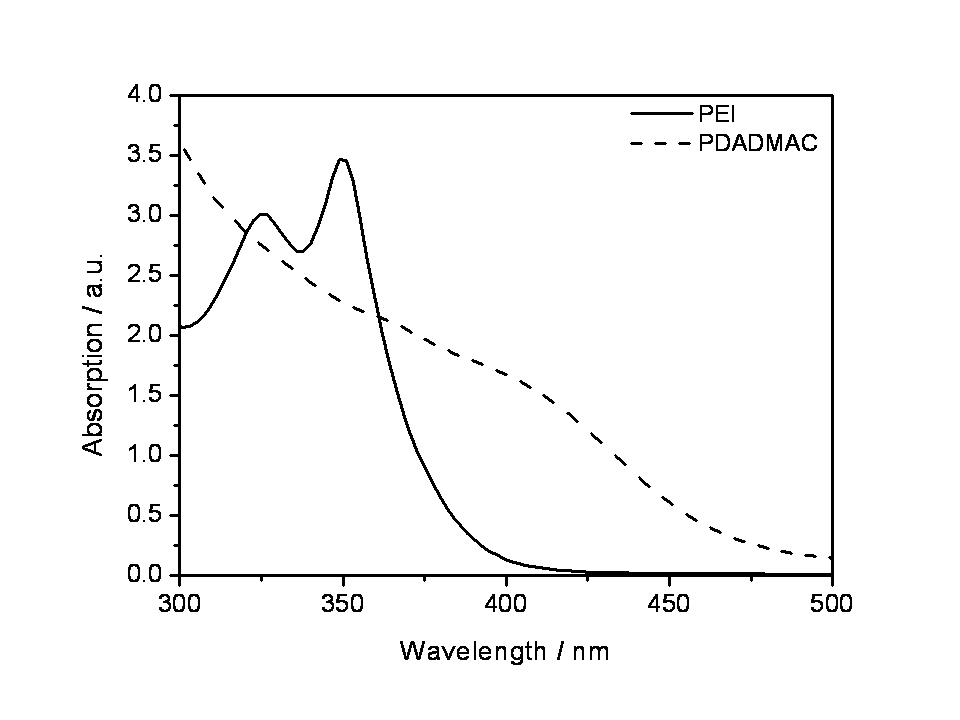


1. Fig. 8. Absorption spectra of the microemulsion system toluene-pentanol (1:1), SDS, water after CdS nanoparticle formation in presence of PEI or PDADMAC at point B


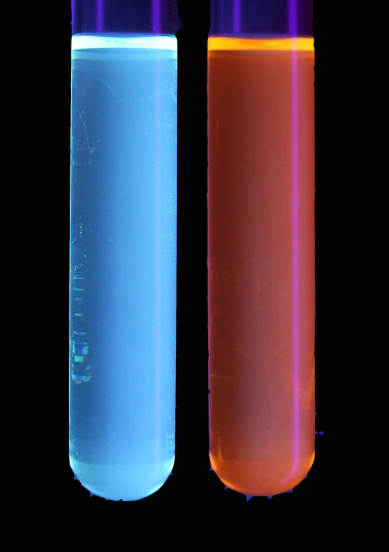


1. Fig. 9. The emission colours of CdS quantum dots produced in the microemulsion system toluene-pentanol (1:1), SDS, PEI (left) and PDADMAC (rigth) at point A excited with a near-UV lamp


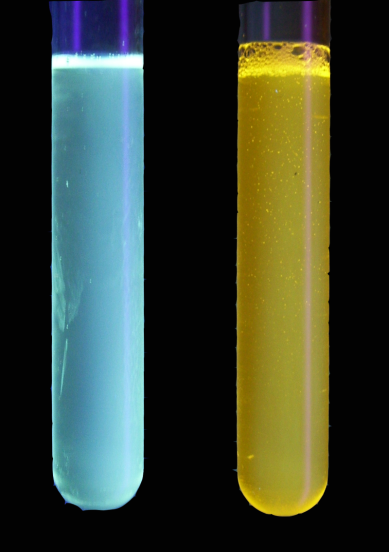


1. Fig. 10. The emission colours of CdS quantum dots produced in the microemulsion system heptanol, SB, PEI (left) and PDADMAC (rigth) at point A excited with a near-UV lamp


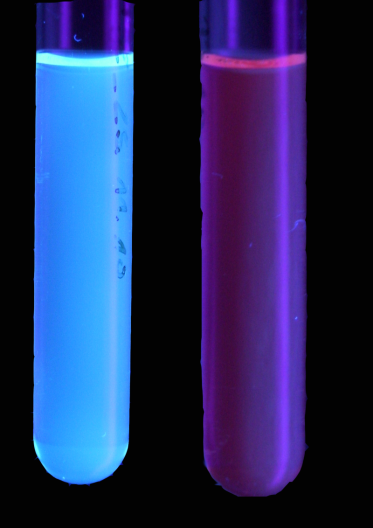


1. Fig. 11. The emission colours of redispersed CdS quantum dots produced in the microemulsion system heptanol, SB, PEI (left) and PDADMAC (rigth) at point A excited with a near-UV lamp


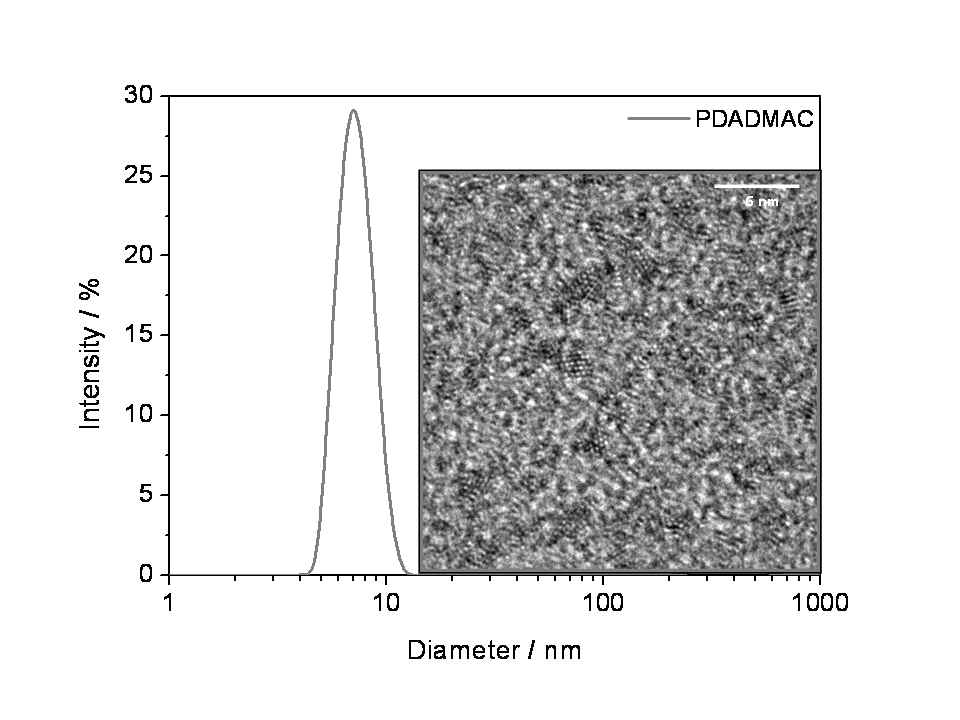


1. Fig. 12. HRTEM of PDADMAC capped redispersed CdS quantum dots produced in the microemulsion system hexane-pentanol (1:1), SB, water (PDADMAC) at point B(20/70/10)


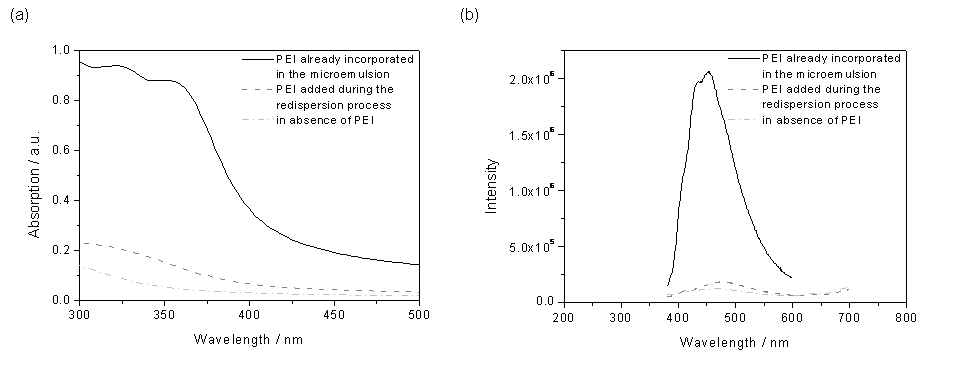


***Fig. 13.*** ***Absorption (a) and fluorescence spectra (b) of redispersed CdS nanoparticles produced in absence of PEI, by adding PEI during the redispersion process in comparison to the spectra given in Fig. 6 (PEI already incorporated in the microemulsion) at point A***

***
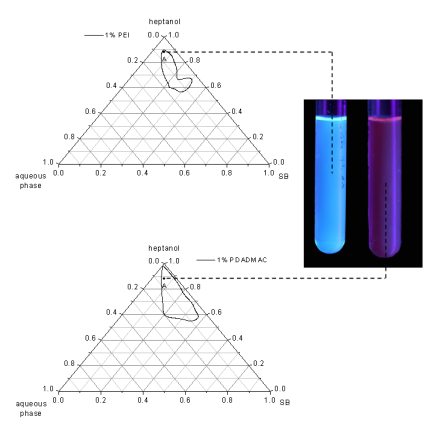
***

***Graphical abstract: The emission colours of redispersed CdS quantum dots produced in the microemulsion system heptanol, SB, PEI (left) and PDADMAC (rigth) at point A.***
